# Supplementary material
Source: PubMed Central journal article supplement (PMC3136278)
Supplement: 1018726108_pnas.201018726SI.pdf [file 1018726108_pnas.201018726SI.pdf]

# Supporting Information

Han et al. 10.1073/pnas.1018726108

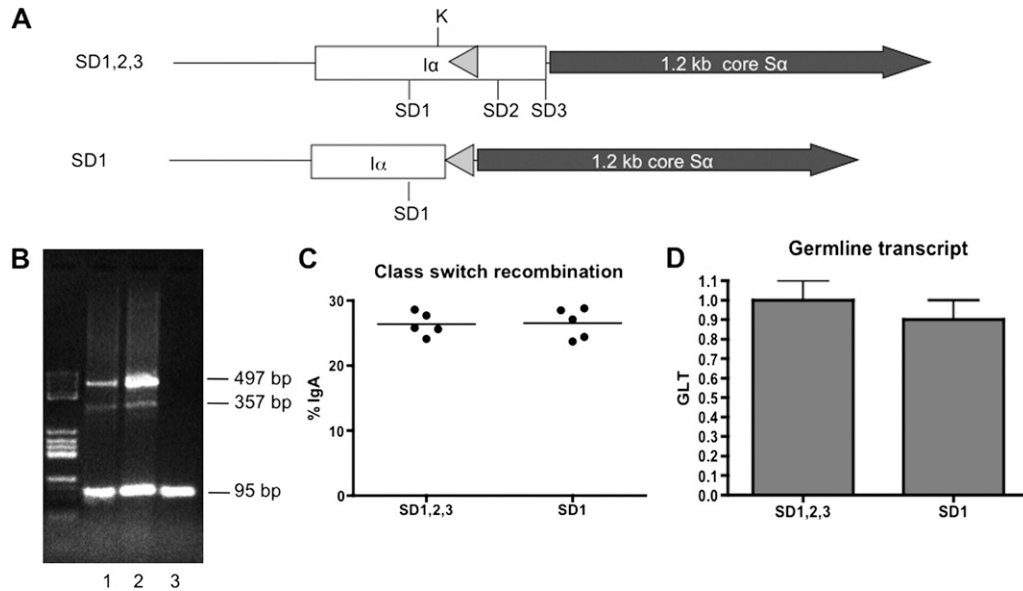

**Fig. S1.** Alternative splicing sites in I $\alpha$ -C $\alpha$  germ-line transcription (GLT). (A) Replacement S $\alpha$  region with or without downstream splice donors SD2 and SD3. (B) RT-PCR of GLT from cells with (lane 1, unstimulated; lane 2, stimulated) and without (lane 3, stimulated) SD2 and SD3. (C) Class-switch assay of cells with or without SD2 and SD3. One of at least three independent experiments was shown. (D) The level of GLTs in stimulated cells. Error bars represent SEM of at least three independent experiments. Each experiment contains at least two independent clones from each construct.

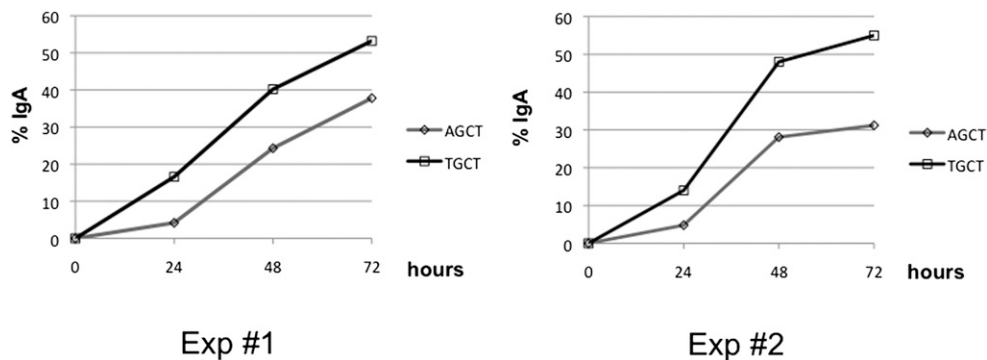

**Fig. S2.** Class-switch recombination (CSR) kinetics. CSR efficiency was determined at 24, 48, and 72 h after cytokine stimulation. Two independent experiments (experiments 1 and 2) were shown.

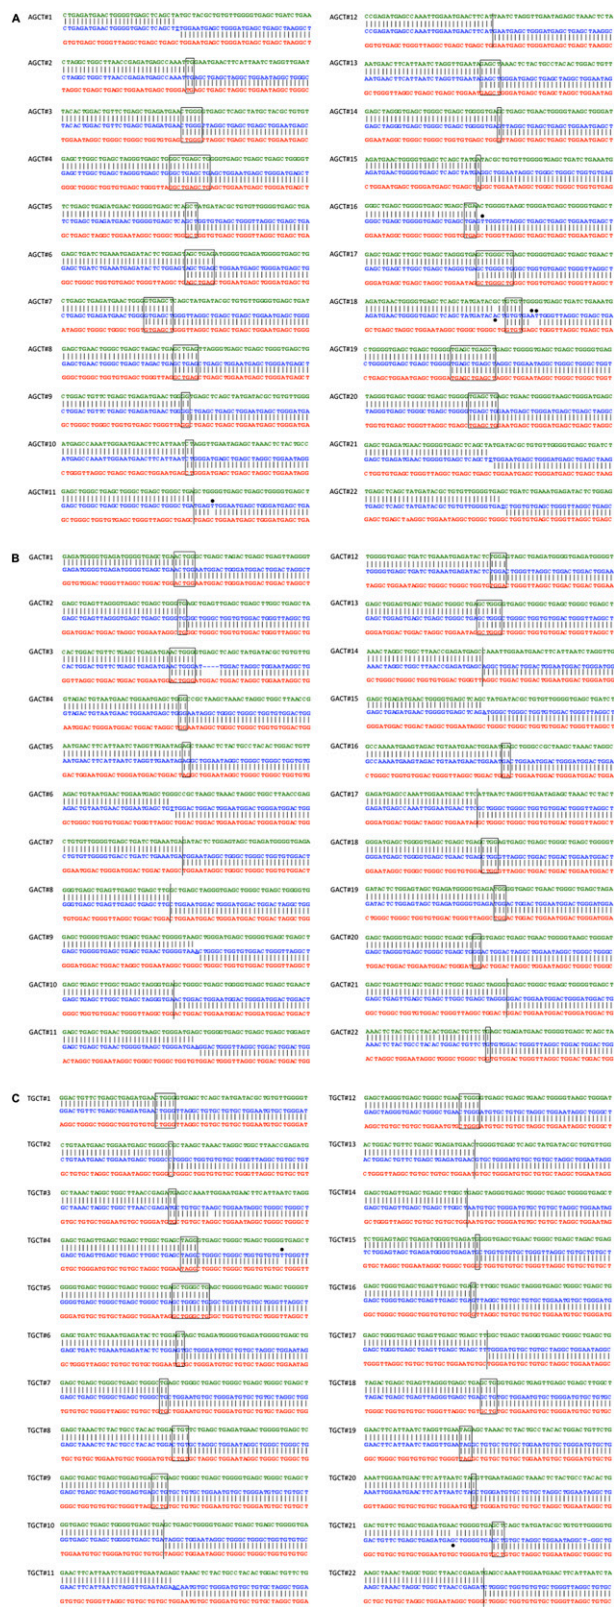

**Fig. 53.**  $S_{\mu}$ - $S_{\alpha}$  junction sequences. (A–C). Alignment of switch junctions with germ-line sequences. Germ-line  $S_{\mu}$  (green) and  $S_{\alpha}$  (red) sequences are listed on the top and bottom, respectively, of each junction sequence (blue) in the middle. Microhomologies (boxes) are identified as the largest perfect matches to the germ-line sequences. Nucleotide additions are underlined. Long vertical lines indicate direct joins. Small vertical lines indicate identity between the junction and germ-line sequences. Mutations around the junction are indicated by dots.





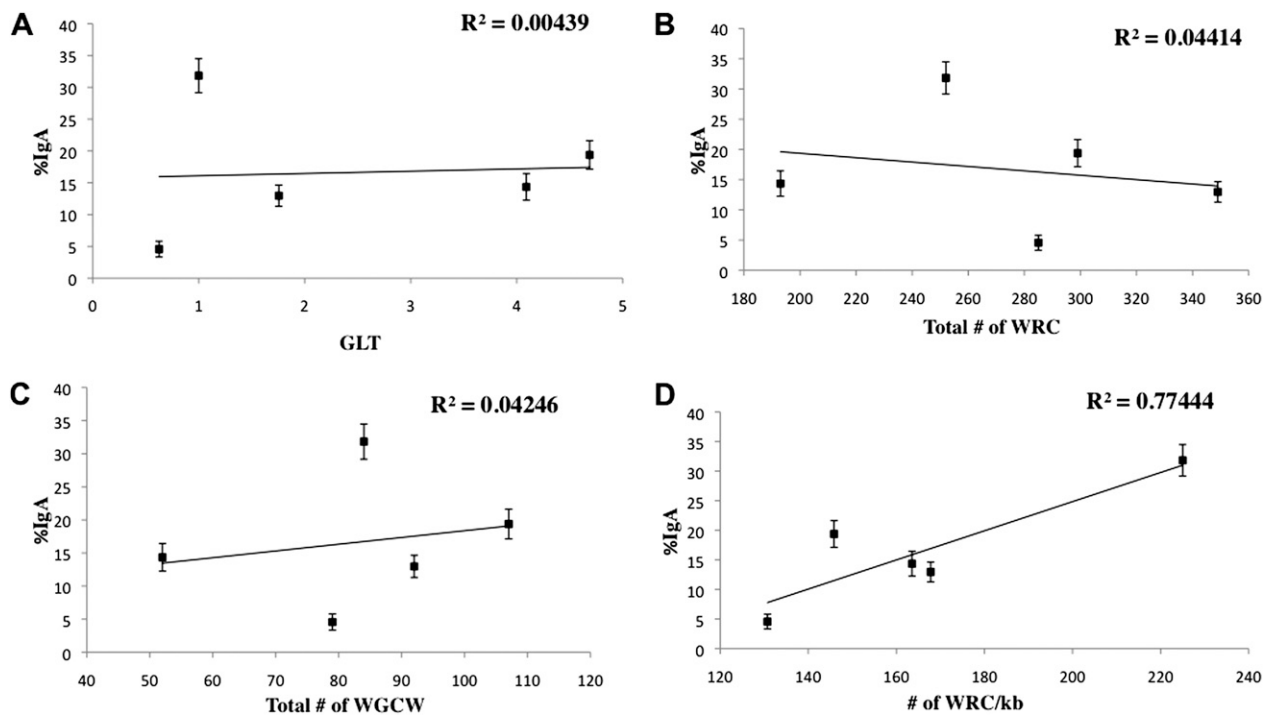

**Fig. 56.** CSR level versus various switch region motifs. CSR efficiency does not correlate with GLT (A), total number of WRC (B), or WGCW (C). CSR efficiency correlates weakly with WRC density (D). All symbols are the same as in Fig. 4.

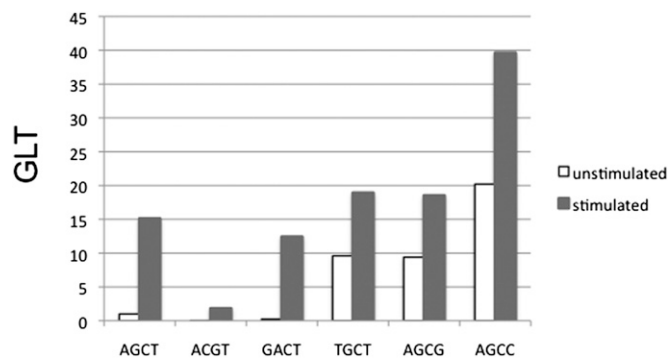

**Fig. 57.** GLT in stimulated and unstimulated cells. High level of GLT in unstimulated cells derived from TGCT, AGCG, and AGCC mutants.

**Table S1. Oligonucleotides and primers**

| Oligonucleotide or primer                                                | Sequence                                     |
|--------------------------------------------------------------------------|----------------------------------------------|
| Oligonucleotides used for the amplification of $I\alpha$ -C $\alpha$ GLT |                                              |
| KY742                                                                    | 5' CCTGGCTGTCCCCTATGAA 3'                    |
| KY743                                                                    | 5' GAGCTCGTGGGAGTGTCA 3'                     |
| Oligonucleotides used in real-time PCR                                   |                                              |
| $\alpha$ C $\alpha$ -Taqman                                              | 5' FAM-CTGCGAGAAATCCCACCATCTACCCA-3' BHQ     |
| $I\alpha$ C $\alpha$ -Fwd                                                | 5' CCTATGAAGGACACTCAACAACATTG 3'             |
| $I\alpha$ C $\alpha$ -Rev                                                | 5' ACAGAGCTCGTGGGAGTGTCA 3'                  |
| Act $\beta$ -Taqman                                                      | 5' FAM-ATCGTGGGCGCCCTAGGCAC 3' BHQ           |
| Act $\beta$ -Fwd                                                         | 5' ATGCTCCCCGGGCTGTA 3'                      |
| Act $\beta$ -Rev                                                         | 5' ATAGGAGTCTTCTGACCCATTCC 3'                |
| PCR primers used to amplify switch junction                              |                                              |
| KY761                                                                    | 5' AACTCTCCAGCCACAGTAATGACC 3' (first round) |
| KY743                                                                    | 5' GAGCTCGTGGGAGTGTCA 3' (first round)       |
| KY762                                                                    | 5' GCTTGAGCCAAATGAAGTAGACT 3' (second round) |
| KY812                                                                    | 5' ATCGATGGATCCGATATCGTC 3' (second round)   |
